# Supplementary material
Source: Springer Nature journal article supplement (https://www.springermedizin.de/resource/supplementary/12936_2011_1904_MOESM2_ESM.pdf/9542050)
Supplement: MOESM2 [file 9542050]

# The Antimalarial Market

Antimalarial  
distribution chain

Antimalarial outlets (health facilities,  
retailers, community workers etc)

Antimalarial use

Household demand for antimalarials and  
treatment seeking behaviour

# Research Methods

## Supply chain research

Structured survey of wholesalers and in-depth interviews with wholesalers and other key informants

## Outlet survey

Nationally representative survey of public and private sector outlets with potential to sell/provide antimalarials

## Household survey

Nationally representative population-based survey
